# Supplementary material for: Proliferation in cardiac fibroblasts induced by β1-adrenoceptor autoantibody and the underlying mechanisms
Source: PubMed Central journal article supplement (PMC5006240; doi:10.1038/srep32430), 2016-08-31
Supplement: srep32430-s1.pdf [file srep32430-s1.pdf]

**Proliferation in cardiac fibroblasts induced by  $\beta_1$ -adrenoceptor autoantibody and the underlying mechanisms**

Tingting Lv<sup>a</sup>, Yunhui Du<sup>a,b</sup>, Ning Cao<sup>a</sup>, Suli Zhang<sup>a,b</sup>, Yulin Gong<sup>a</sup>, Yan Bai<sup>a</sup>, Wen Wang<sup>a,b</sup>, Huirong Liu<sup>a,b\*</sup>

<sup>a</sup> Department of Physiology and Pathophysiology, School of Basic Medical Sciences, Capital Medical University, Beijing 100069, PR China

<sup>b</sup> Beijing Key Laboratory of Metabolic Disorders Related Cardiovascular Disease, Capital Medical University, Beijing 100069, PR China

\*Correspondence to: Prof. Huirong Liu, Department of physiology and pathophysiology, School of Basic Medical Sciences, Capital Medical University, Beijing 100069, PR China. Telephone: 011-86-10-83911830; Fax: 011-86-10-63294027; E-mail address: liuhr2000@126.com.

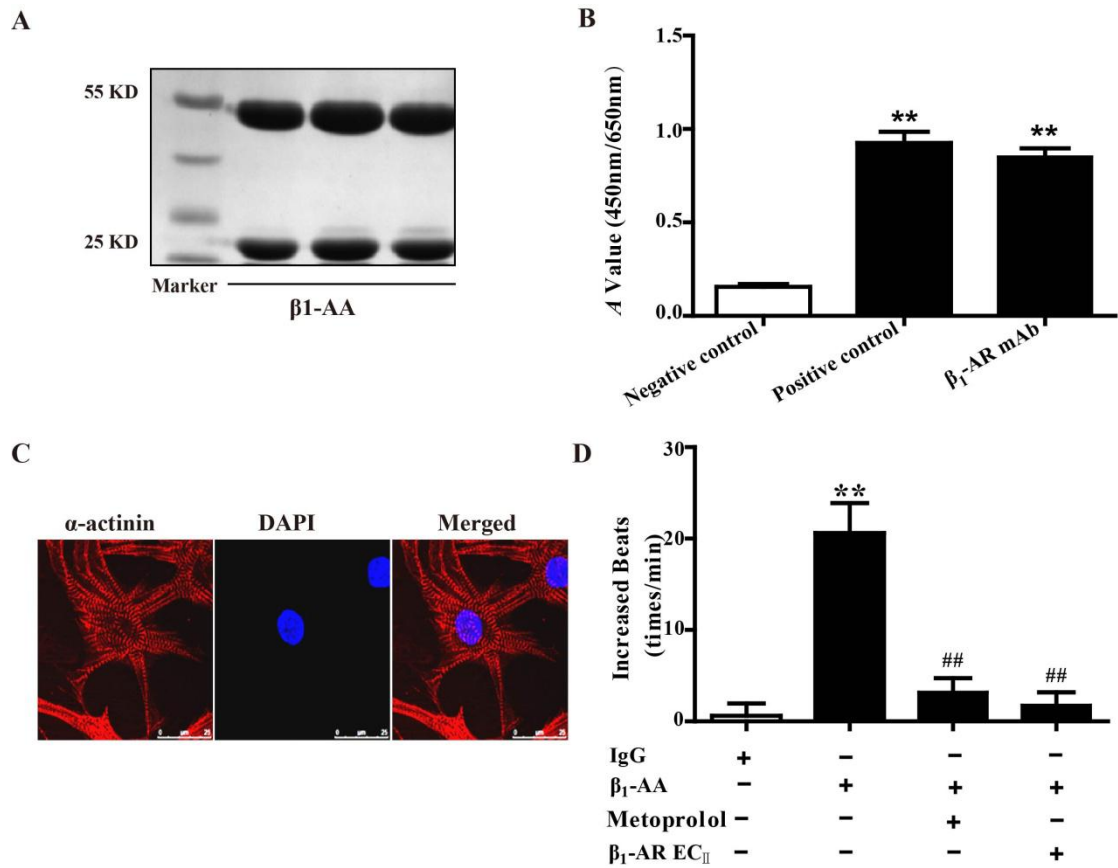

Fig.S1. Functional identification of monoclonal antibodies of  $\beta_1$ -AR EC<sub>II</sub> ( $\beta_1$ -AR mAb). A. The purity of  $\beta_1$ -AR mAb was detected by SDS-Page. B. The binding of  $\beta_1$ -AR mAb and  $\beta_1$ -AR EC<sub>II</sub> was detected by SA-ELISA. C. The cultured neonatal rat cardiomyocytes were identified by immunofluorescence cellular staining of  $\alpha$ -actinin. D. The increased beating frequency of primary neonatal rat cardiomyocytes was counted to evaluate the activity of  $\beta_1$ -AR mAb. \*\* $P < 0.01$  vs. negative control or IgG, ## $P < 0.01$  vs.  $\beta_1$ -AA,  $n=6$  per group. Data were presented as mean  $\pm$  SEM of 3 independent experiments.

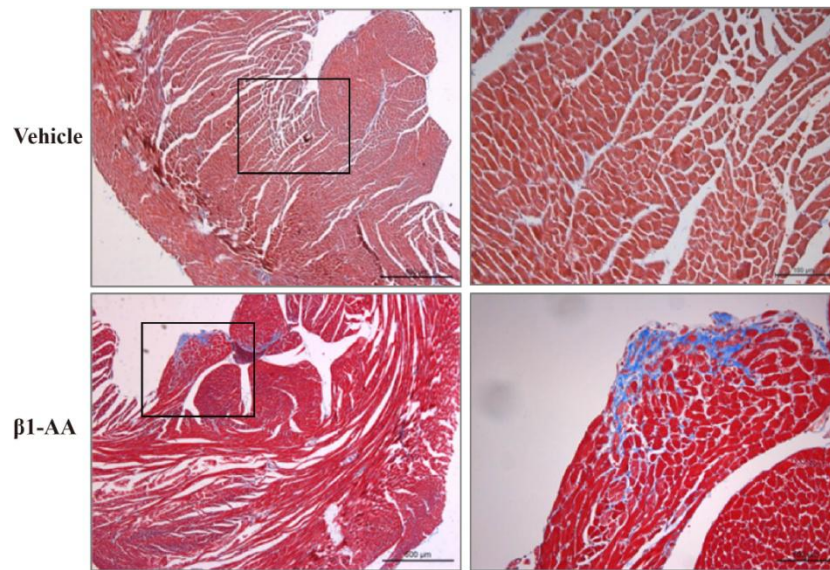

Fig.S2. Collagen deposition was evaluated by Masson staining in the heart of mice in vehicle and  $\beta_1$ -AA group at the 8<sup>th</sup> week of model. Representative Masson staining of heart tissue of vehicle and  $\beta_1$ -AA group was shown in the figure. The collagen deposition appeared blue. The results showed that the area of collagen deposition around the cardiac cells in  $\beta_1$ -AA group was much more than that in vehicle group. The graph on the right is the enlargement of the left. Scale =500  $\mu\text{m}$  (left), 100 $\mu\text{m}$  (right).

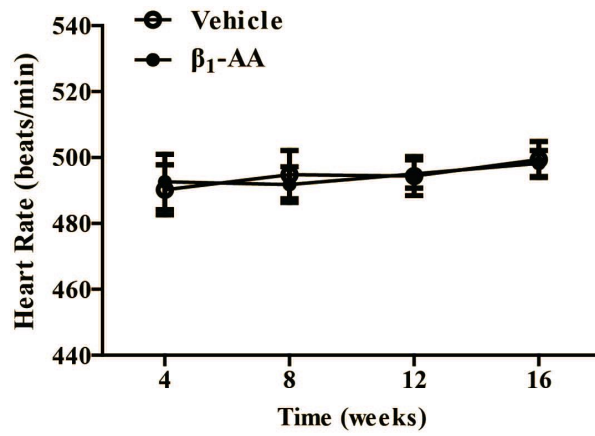

Fig.S3. The characterization of heart rate of mice in vehicle or  $\beta_1$ -AA group during the 16<sup>th</sup> week. The heart rate of mice in  $\beta_1$ -AA and vehicle group was detected at the 4<sup>th</sup>, 8<sup>th</sup>, 12<sup>th</sup> and 16<sup>th</sup> during the 16<sup>th</sup> week. The results showed that there was no obvious difference between  $\beta_1$ -AA and vehicle group. n=8.

**A**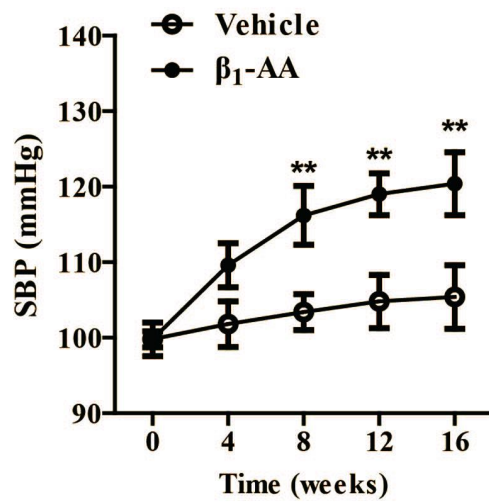**B**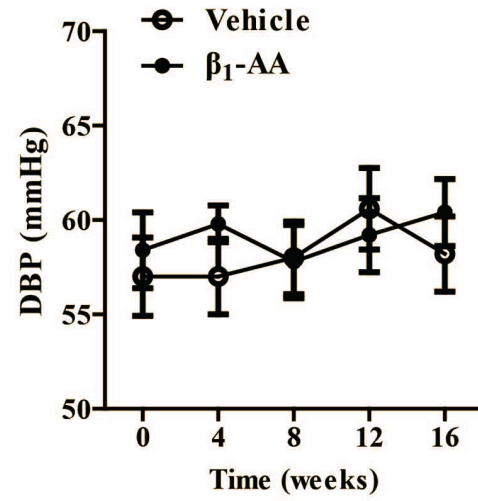

Fig.S4. The dynamic change of blood pressure of mice during the 16<sup>th</sup> week. A. The systolic blood pressure (SBP) of mice in  $\beta_1$ -AA and vehicle group during the 16<sup>th</sup> week. B. The diastolic blood pressure (DBP) of mice in  $\beta_1$ -AA and vehicle group during the 16<sup>th</sup> week. \*\* $P < 0.01$  vs. Vehicle group,  $n=8$  per group. Data were presented as mean  $\pm$  SEM of 3 independent experiments.

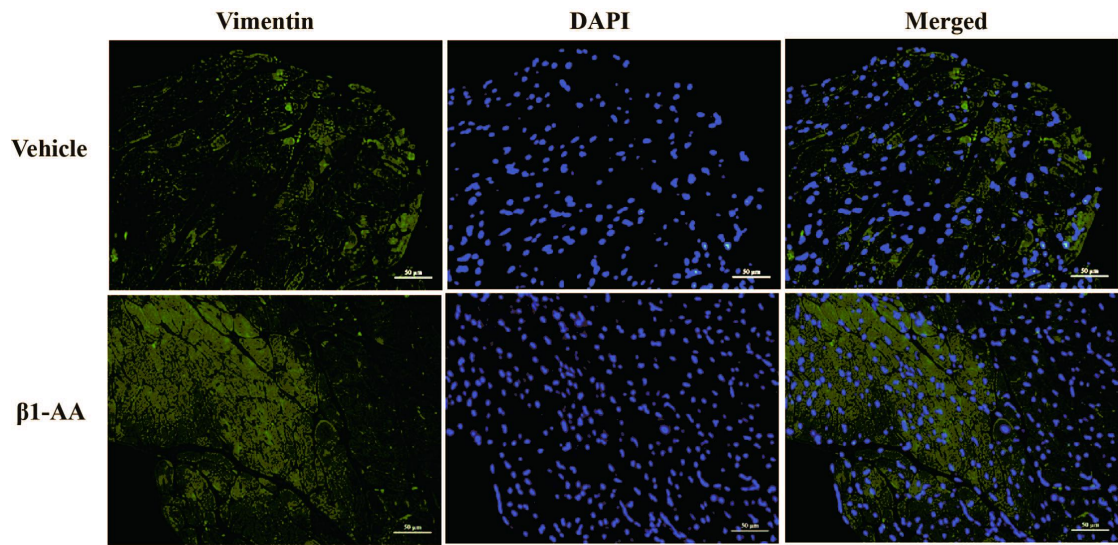

Fig. S5. Cardiac fibroblast proliferated in the heart of mice treated with  $\beta_1$ -AA at the 8<sup>th</sup> week of passive immunization. The expression of vimentin as the marker of cardiac fibroblasts in heart of  $\beta_1$ -AA group or vehicle group was detected by immunofluorescence labeling, which was observed under the fluorescence microscope. The expression of vimentin in papillary muscle of heart in  $\beta_1$ -AA group was much higher than that in vehicle group, which indicated that the cardiac fibroblasts proliferated after  $\beta_1$ -AA treatment. Scale bar=50  $\mu$ m.

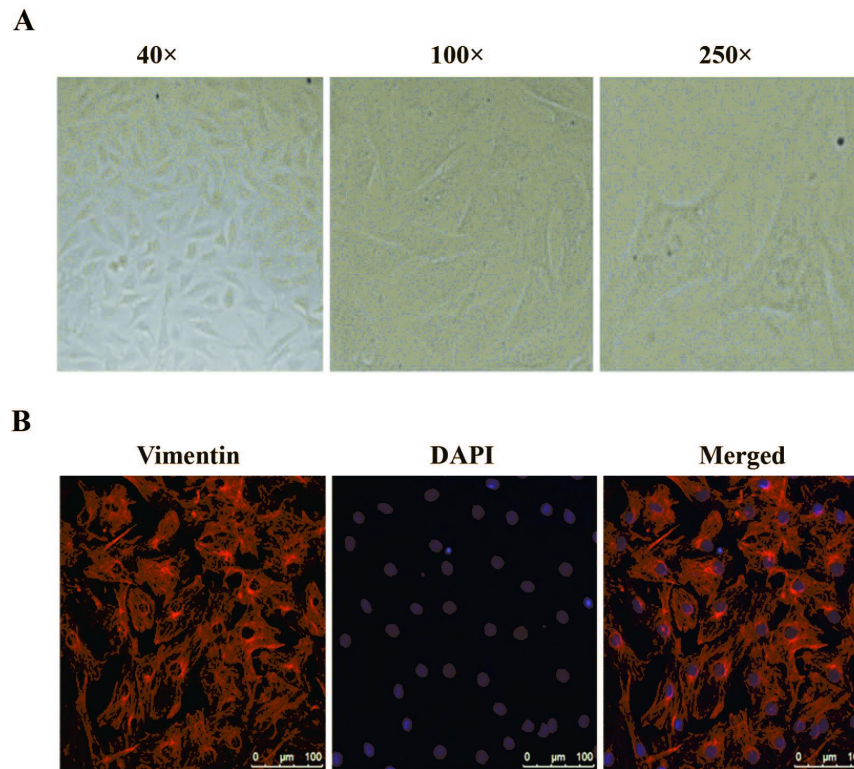

Fig.S6. The positivity of cardiac fibroblasts identified by vimentin was more than 95%. A. The cellular morphology of primary neonatal rat cardiac fibroblasts was observed in light microscope. The magnification is 40, 100 or 250 times. B. The identification of cardiac fibroblasts was performed by immunofluorescence cellular staining of vimentin. The Scale Bar=100  $\mu\text{m}$ .
